# Supplementary material
Source: PubMed Central journal article supplement (PMC3672955)
Supplement: NIHMS51382-supplement-1.pdf [file NIHMS51382-supplement-1.pdf]

Supplementary Material: Fig.1 and Fig.2

# Supplementary Figure 1

a

B220  
GL-7  
eYFP

$T_H17$  TCRa<sup>-/-</sup>

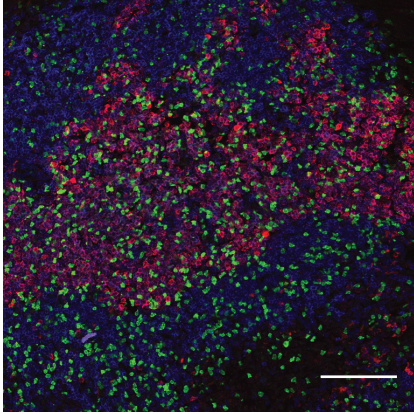

Immunohistochemistry of PP tissue for expression of B220 (blue), GL-7 (red) and eYFP (green). Scale bars, 100 $\mu$ m.

Supplementary Fig.2

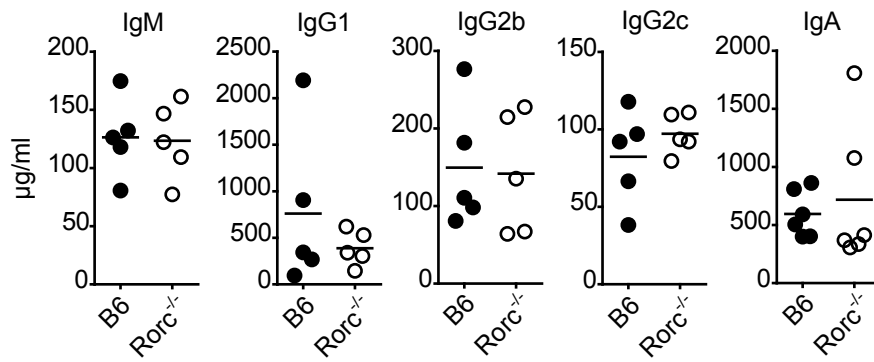

Serum Ig isotypes in  $TCR\alpha^{-/-}$  hosts reconstituted with B6 or  $Rorc$ -deficient bone marrow determined by ELISA 6 weeks after reconstitution (baseline prior to immunization)
